# Supplementary material
Source: PubMed Central journal article supplement (PMC10226739)
Supplement: ciac581_supplementary_data.pdf [file ciac581_supplementary_data.pdf]

# Supplementary Material

## Table of Contents

|                                                                                                                                                                   |    |
|-------------------------------------------------------------------------------------------------------------------------------------------------------------------|----|
| <i>Supplementary Data</i> .....                                                                                                                                   | 2  |
| Supplementary Data S1. Search strategy .....                                                                                                                      | 2  |
| Supplementary Data S2. Continuous-time Markov model (CTMM) description.....                                                                                       | 3  |
| <i>Supplementary Tables</i> .....                                                                                                                                 | 5  |
| Supplementary Table S1. Characteristics of included studies. ....                                                                                                 | 5  |
| Supplementary Table S2. Characteristics of included individuals in six risk groups. ....                                                                          | 7  |
| Supplementary Table S3. Hazard ratios of anal HPV16 incidence and clearance by population.....                                                                    | 9  |
| <i>Supplementary Figures</i> .....                                                                                                                                | 10 |
| Supplementary Figure S1. Flow chart.....                                                                                                                          | 10 |
| Supplementary Figure S2. Number of anal high-risk HPV prevalent and incident infection during the study period<br>in six risk groups.....                         | 11 |
| Supplementary Figure S3. Cumulative incidence and clearance of anal HPV16 infection in WLWH and HIV-<br>negative women, by age group. ....                        | 12 |
| Supplementary Figure S4. Prevalence at baseline of anal type-specific high-risk HPV infection in six risk groups. 13                                              |    |
| Supplementary Figure S5. Incidence and clearance of anal type-specific high-risk HPV infection in six risk groups<br>by use of standard person-time approach..... | 14 |
| <i>References</i> .....                                                                                                                                           | 15 |

## Supplementary Data

### Supplementary Data S1. Search strategy

MEDLINE:

((("papillomaviridae"[MeSH Terms] OR "papillomaviridae"[Title/Abstract]) OR "human papilloma virus"[Title/Abstract]) OR "human papillomavirus"[Title/Abstract] OR "hpv"[Title/Abstract] OR "Human papillomaviruses"[Title/Abstract]) AND ("Anal Canal"[MeSH Terms] OR "anus"[Title/Abstract] OR "anal"[Title/Abstract] OR "perianal"[Title/Abstract]) AND ("Incidence"[MeSH Terms] OR "Cohort Studies"[MeSH Terms] OR "Natural History"[MeSH Terms] OR "Longitudinal Studies"[MeSH Terms] OR "Prospective Studies"[MeSH Terms] OR "inciden\*"[Title/Abstract] OR "acqui\*"[Title/Abstract] OR "clear\*"[Title/Abstract] OR "persist\*"[Title/Abstract] OR "Natural History"[Title/Abstract] OR "longitudinal"[Title/Abstract] OR "prospective"[Title/Abstract] OR "cohort"[Title/Abstract])

Embase:

1) 'Papillomaviridae'/exp OR 'papillomaviridae':ti,ab,kw OR 'human papilloma virus infection':ti,ab,kw OR 'human papillomavirus infection':ti,ab,kw OR hpv:ti,ab,kw OR 'Human papillomaviruses':ti,ab,kw

2) 'anal Canal'/exp OR 'anal canal':ti,ab,kw OR 'anus':ti,ab,kw OR 'anal':ti,ab,kw OR 'perianal':ti,ab,kw

3) 'Incidence'/exp OR 'Cohort Studies'/exp OR cohort:ti,ab,kw OR 'Natural History'/exp OR 'Longitudinal Studies'/exp OR 'Prospective Studies'/exp OR 'inciden\*':ti,ab,kw OR 'acqui\*':ti,ab,kw OR 'clear\*':ti,ab,kw OR 'persist\*':ti,ab,kw OR 'Natural History':ti,ab,kw OR 'longitudinal':ti,ab,kw OR 'prospective':ti,ab,kw OR 'cohort':ti,ab,kw

4) 1 AND 2 AND 3

## Supplementary Data S2. Continuous-time Markov model (CTMM) description

We collected longitudinal data on type-specific anal HPV status of individuals at different visits. The time of the visit is of limited information when estimating incidence and clearance rates since it does not give the exact time of incidence and clearance of an infection. This means that HPV status is interval censored. Furthermore, the current study is a collaborative pooled analyses in which we included different studies with heterogeneous visit intervals. CTMM is well fitted to analyse this type of data since they handle interval censored observation and allows inclusion of constant and time-varying variables acting on incidence and clearance rates.

The following co-variables were considered in the two-state CTMM: 1) HIV status (hiv, including negative and positive), 2) population group (popg, including MSM, women, and MSW), 3) age group (ageg, including <25, 25-34, 35-44, 45-54, and  $\geq 55$  years); and 4) infection type (inft), including prevalent infection (for continuous positive test since baseline) and incident infection (for any positive test after at least one negative test has been observed). In the model, HIV status, population group, and age group were considered constant over time, and infection type was included as a time-changing variable. The schematic representation of the two-state CTMM was showed as below:

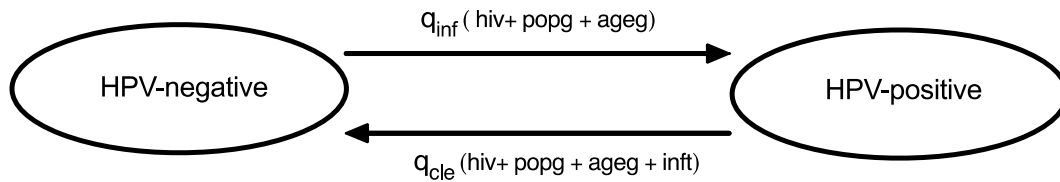

The model was run separately for each hrHPV type.

At a time  $t$  the individual is in the state  $S(t)$  (HPV-Positive or HPV-Negative) and a person can switch between two states using a transition intensity distribution. At any point in time an individual can switch state according to a transition intensity  $q_{rs}(t, z(t))$ . The transition intensity distribution  $q_{rs}(t, z(t))$  represents the instantaneous risk of moving from state  $r$  to state  $s$ . This transition rate can depend on an individual-specific covariable (that is allowed to change over time  $t$ ) indicated with  $z(t)$ .

$$q_{rs}(t, z(t)) = \lim_{\delta t \rightarrow 0} P(S(t + \delta t) = s | S(t) = r) / \delta t$$

where  $P(S(t + \delta t) = s | S(t) = r)$  represents the probability to be in state  $s$  at time  $t + \delta t$  knowing that the individual was in state  $r$  at time  $t$ .

At population/study level, the matrix of transition intensity  $Q(z(t))$  is estimated with a proportional hazard model:

$$Q(z(t)) = \begin{pmatrix} -q_{01}(z(t)) & q_{01}(z(t)) \\ q_{10}(z(t)) & -q_{10}(z(t)) \end{pmatrix}$$

where  $q_{01}(z(t))$  is the transition intensity from HPV-negative to HPV-positive state (incidence rate) and  $q_{10}(z(t))$  is the transition intensity from HPV-positive to HPV-negative state (clearance rate) for an individual with the  $z(t)$  characteristics at time  $t$ . More specifically,

$$q_{01}(z(t)) = q_{01}^{(0)} \exp(\beta_{\text{hiv}} \text{hiv} + \beta_{\text{popg}} \text{popg} + \beta_{\text{ageg}} \text{ageg})$$

$$q_{10}(z(t)) = q_{10}^{(0)} \exp(\beta_{\text{hiv}} \text{hiv} + \beta_{\text{popg}} \text{popg} + \beta_{\text{ageg}} \text{ageg} + \beta_{\text{inft}} \text{inft}(t))$$

where  $q_{01}^{(0)}$  and  $q_{10}^{(0)}$  are the baseline infection and clearance intensities, hiv indicates HIV status (negative and positive), popg indicates the population group (MSM, women, and MSW), ageg indicates the age group (<25, 25-35, 35-44, 45-54, and  $\geq 55$  years) and inft( $t$ ) indicates the infection type (incident and prevalent infection) of the individual at time  $t$ .

The transition probability matrix  $P(t, z(t))$  using the above-described transition intensity can be defined as:

$$P(t, z(t)) = \begin{pmatrix} p_{00}(t, z(t)) & p_{01}(t, z(t)) \\ p_{10}(t, z(t)) & p_{11}(t, z(t)) \end{pmatrix} = \text{Exp}(tQ(z(t)))$$

The model is optimized using likelihood function  $L(Q(z(t)))$  which is the product of all the terms  $L_{i,j}(z(t))$  over all the individuals and all the transitions. Final model coefficients are estimated by maximisation of  $L(Q(z(t)))$ .

Our dataset is composed of a total of  $I$  individuals  $i$ . Everyone has been tested a total of  $J_i$  and each individual test is indicated with  $j$ .

The likelihood  $L_{i,j}(z(t))$  of two consecutive tests  $S_i(t_j)$  and  $S_i(t_{j+1})$  at time  $j$  and  $j + 1$  is defined as:

$$L_{i,j}(z(t)) = p_{S_i(t_j)S_i(t_{j+1})}(t_{j+1} - t_j)$$

## Supplementary Tables

### Supplementary Table S1. Characteristics of included studies.

| Study                                      | Country      | Study period    | Visit interval | MSMLWH | HIV-neg MSM | WLWH | HIV-neg women | MSWLWH | HIV-neg MSW |
|--------------------------------------------|--------------|-----------------|----------------|--------|-------------|------|---------------|--------|-------------|
| Goodman et al (2008) <sup>1</sup>          | USA          | 1999.07–2009.12 | 4 months       | 0      | 0           | 3    | 1384          | 0      | 0           |
| de Pokomandy et al (2009) <sup>2</sup>     | Canada       | 2002.01–2007.11 | 6 months       | 224    | 0           | 0    | 0             | 0      | 0           |
| Beachler et al (2013) <sup>3</sup>         | USA          | 2006.03–2008.11 | 6 months       | 53     | 0           | 117  | 0             | 109    | 0           |
| Mullins et al (2013) <sup>4</sup>          | USA          | 1996.02–2000.11 | 12 months      | 0      | 0           | 205  | 92            | 0      | 0           |
| Phanuphak et al (2013) <sup>5</sup>        | Thailand     | 2009.12–2012.03 | 6 months       | 96     | 75          | 0    | 0             | 0      | 0           |
| Wiley et al (2013) <sup>6</sup>            | USA          | 2010.04–2015.08 | 6 months       | 583    | 637         | 0    | 0             | 9      | 11          |
| Hessol et al (2013) <sup>7</sup>           | USA          | 2001.10–2006.03 | 6 months       | 0      | 0           | 443  | 175           | 0      | 0           |
| Moscicki et al (2014) <sup>8</sup>         | USA          | 2009.08–2015.01 | 4 months       | 0      | 0           | 8    | 111           | 0      | 0           |
| Burgos et al (2015) <sup>9</sup>           | Spain        | 2004.10–2018.04 | 12 months      | 427    | 0           | 0    | 0             | 0      | 0           |
| Zou et al (2015) <sup>10</sup>             | Australia    | 2010.09–2013.08 | 3 months       | 0      | 186         | 0    | 0             | 0      | 0           |
| Donà et al (2016) <sup>11</sup>            | Italy        | 2009.08–2015.01 | 6 months       | 0      | 155         | 0    | 0             | 0      | 0           |
| Geskus et al (2016) <sup>12</sup>          | Spain        | 2007.05–2013.05 | 12 months      | 604    | 0           | 0    | 0             | 0      | 0           |
| Schofield et al (2016) <sup>13</sup>       | UK           | 2013.03–2015.05 | 6 months       | 143    | 63          | 7    | 4             | 0      | 0           |
| de Pokomandy et al (2017) <sup>14</sup>    | Canada       | 2012.01–2017.03 | 6 months       | 0      | 0           | 125  | 0             | 0      | 0           |
| Hidalgo-Tenorio et al (2018) <sup>15</sup> | Spain        | 2012.05–2016.12 | ...            | 0      | 0           | 53   | 0             | 0      | 0           |
| Ong et al (2018) <sup>16</sup>             | Australia    | 2012.12–2016.05 | 24 months      | 188    | 0           | 0    | 0             | 0      | 0           |
| Chikandiwa et al (2019) <sup>17</sup>      | South Africa | 2012.09–2016.11 | 18 months      | 11     | 0           | 0    | 0             | 144    | 0           |
| Hidalgo-Tenorio et al (2019) <sup>18</sup> | Spain        | 2010.04–2018.12 | ...            | 230    | 0           | 0    | 0             | 0      | 0           |
| Marra et al (2019) <sup>19</sup>           | Netherlands  | 2010.07–2013.07 | 6 months       | 309    | 443         | 0    | 0             | 0      | 0           |

| Study                                  | Country                       | Study period    | Visit interval | MSMLWH | HIV-neg MSM | WLWH | HIV-neg women | MSWLWH | HIV-neg MSW |
|----------------------------------------|-------------------------------|-----------------|----------------|--------|-------------|------|---------------|--------|-------------|
| Nowak et al (2019) <sup>20</sup>       | Nigeria                       | 2013.04–2017.08 | 3 months       | 146    | 106         | 0    | 0             | 0      | 0           |
| Nyitray et al (2019) <sup>21</sup>     | USA, Mexico, Brazil           | 2005.06–2016.03 | 6 months       | 8      | 356         | 0    | 0             | 1      | 1071        |
| Viciano et al (2019) <sup>22</sup>     | Spain                         | 2008.01–2019.04 | 16 months      | 642    | 0           | 0    | 0             | 3      | 0           |
| Phanuphak et al (2020) <sup>23</sup>   | Thailand, Vietnam             | 2013.06–2017.06 | 12 months      | 0      | 0           | 85   | 87            | 0      | 0           |
| Alberts et al (2020) <sup>24</sup>     | France                        | 2014.12–2018.06 | 12 months      | 438    | 0           | 0    | 0             | 0      | 0           |
| Fan et al (2020) <sup>25</sup>         | China                         | 2018.11–2021.05 | 12 months      | 0      | 200         | 0    | 0             | 0      | 0           |
| Gatechompol et al (2020) <sup>26</sup> | Thailand, Vietnam             | 2013.06–2017.06 | 12 months      | 7      | 15          | 0    | 0             | 37     | 23          |
| Wei et al (2020) <sup>27</sup>         | China                         | 2014.05–2016.03 | 6 months       | 0      | 3           | 0    | 2024          | 0      | 1586        |
| Yuniastuti et al (2020) <sup>28</sup>  | Indonesia, Malaysia, Thailand | 2011.03–2015.12 | 6 months       | 143    | 93          | 0    | 0             | 0      | 0           |
| Cotte et al (2021) <sup>29</sup>       | France                        | 2012.12–2016.06 | 6 months       | 0      | 139         | 0    | 0             | 0      | 0           |
| Liu et al (2021) <sup>30</sup>         | China                         | 2016.04–2019.12 | 6 months       | 0      | 482         | 0    | 0             | 0      | 0           |
| Poynten et al (2021) <sup>31</sup>     | Australia                     | 2010.09–2018.04 | 12 months      | 186    | 324         | 0    | 0             | 0      | 0           |
| Squillace et al (2021) <sup>32</sup>   | Italy                         | 2010.02–2019.02 | ...            | 89     | 0           | 16   | 0             | 27     | 0           |
| Donà et al (2022) <sup>33</sup>        | Italy                         | 2009.11–2020.01 | 6 months       | 204    | 0           | 0    | 0             | 0      | 0           |
| Zhou et al (2022) <sup>34</sup>        | China                         | 2017.01–2018.11 | 12 months      | 14     | 182         | 0    | 0             | 0      | 0           |
| <b>Overall</b>                         | ...                           | ...             | ...            | 4745   | 3459        | 1062 | 3877          | 330    | 2691        |

Abbreviations: MSM, men who have sex with men; MSMLWH, MSM living with HIV; WLWH, women living with HIV; MSW, men who have sex with women; MSWLWH, MSW living with HIV; HIV-neg, HIV negative. Studies are ranked in ascending order of the year of publication.

**Supplementary Table S2. Characteristics of included individuals in six risk groups.**

|                                                   | MSMLWH       | HIV-neg MSM  | WLWH        | HIV-neg women | MSWLWH      | HIV-neg MSW  | Overall       |
|---------------------------------------------------|--------------|--------------|-------------|---------------|-------------|--------------|---------------|
| <b>No. at baseline</b>                            | <b>4745</b>  | <b>3459</b>  | <b>1062</b> | <b>3877</b>   | <b>330</b>  | <b>2691</b>  | <b>16 164</b> |
| Age (years) (n=16 164)                            |              |              |             |               |             |              |               |
| Median (IQR)                                      | 42 (33, 51)  | 35 (26, 48)  | 37 (19, 46) | 32 (23, 44)   | 42 (34, 48) | 37 (28, 45)  | 37 (27, 47)   |
| Lifetime number of sexual partners (n=12 402)*    |              |              |             |               |             |              |               |
| Low                                               | 1678 (63.1%) | 1542 (68.8%) | 181 (22.8%) | 2540 (67.9%)  | 46 (16.2%)  | 1894 (72.4%) | 7881 (63.5%)  |
| High                                              | 980 (36.9%)  | 767 (33.2%)  | 614 (77.2%) | 1199 (32.1%)  | 238 (83.8%) | 723 (27.6%)  | 4521 (36.5%)  |
| Ever having receptive anal sex (n=8342)           |              |              |             |               |             |              |               |
| No                                                | 336 (11.2%)  | 462 (16.5%)  | 535 (67.4%) | 1161 (66.7%)  | ...         | ...          | 2494 (29.9%)  |
| Yes                                               | 2673 (88.8%) | 2336 (83.5%) | 259 (32.6%) | 580 (33.3%)   | ...         | ...          | 5848 (70.1%)  |
| Lifetime number of anal sexual partners (n=4890)† |              |              |             |               |             |              |               |
| Low                                               | 642 (52.3%)  | 768 (68.1%)  | 535 (67.4%) | 1161 (66.7%)  | ...         | ...          | 3106 (63.5%)  |
| High                                              | 585 (47.7%)  | 360 (31.9%)  | 259 (32.6%) | 580 (33.3%)   | ...         | ...          | 1784 (36.5%)  |
| Current smoking (n=8259)                          |              |              |             |               |             |              |               |
| No                                                | 2490 (63.0%) | 1923 (82.0%) | 355 (48.0%) | 176 (60.7%)   | 152 (98.7%) | 5 (100%)     | 5746 (69.6%)  |
| Yes                                               | 1463 (37.0%) | 422 (18.0%)  | 385 (52.0%) | 114 (39.3%)   | 2 (1.3%)    | 0 (0%)       | 2513 (30.4%)  |
| Presence of anal HSIL at baseline (n=5105)        |              |              |             |               |             |              |               |
| No                                                | 2569 (82.7%) | 1003 (84.8%) | 451 (94.4%) | 174 (98.3%)   | 152 (98.7%) | 5 (100%)     | 4354 (85.3%)  |
| Yes                                               | 539 (17.3%)  | 180 (15.2%)  | 27 (5.6%)   | 3 (1.7%)      | 2 (1.3%)    | 0 (0%)       | 751 (14.7%)   |

|                                                   | MSMLWH         | HIV-neg MSM    | WLWH           | HIV-neg women  | MSWLWH         | HIV-neg MSW    | Overall        |
|---------------------------------------------------|----------------|----------------|----------------|----------------|----------------|----------------|----------------|
| <b>No. at all visits</b>                          | <b>15 792</b>  | <b>12 904</b>  | <b>4991</b>    | <b>14 349</b>  | <b>871</b>     | <b>7141</b>    | <b>56 048</b>  |
| Visit number (n=56 048)                           |                |                |                |                |                |                |                |
| Median (IQR)                                      | 3.0 (2.0, 4.0) | 4.0 (2.0, 5.0) | 4.0 (3.0, 7.0) | 3.0 (3.0, 4.0) | 2.0 (2.0, 3.0) | 2.0 (2.0, 3.0) | 3.0 (2.0, 4.0) |
| Follow-up time (years) (n=56 048)                 |                |                |                |                |                |                |                |
| Median (IQR)                                      | 2.1 (1.2, 3.2) | 2.0 (1.0, 2.5) | 2.5 (1.8, 3.5) | 1.0 (1.0, 1.3) | 1.5 (1.3, 2.0) | 1.0 (0.5, 1.1) | 1.4 (1.0, 2.5) |
| Recent number of sexual partners (n=31 180)‡      |                |                |                |                |                |                |                |
| Low                                               | 3687 (74.7%)   | 3829 (71.9%)   | 3301 (90.0%)   | 8837 (90.8%)   | 367 (79.3%)    | 6128 (86.8%)   | 26 149 (83.9%) |
| High                                              | 1251 (25.3%)   | 1494 (28.1%)   | 366 (10.0%)    | 893 (9.2%)     | 96 (20.7%)     | 931 (13.2%)    | 5031 (16.1%)   |
| Recent number of anal sexual partners (n=21 611)§ |                |                |                |                |                |                |                |
| Low                                               | 4442 (70.8%)   | 4890 (72.9%)   | 1991 (89.1%)   | 5687 (88.9%)   | ...            | ...            | 17 010 (78.7%) |
| High                                              | 1831 (29.2%)   | 1816 (27.1%)   | 243 (10.9%)    | 711 (11.1%)    | ...            | ...            | 4601 (21.3%)   |
| Current CD4 count (cells per µl) (n=19 865)       |                |                |                |                |                |                |                |
| >500                                              | 8969 (60.2%)   | ...            | 2140 (47.6%)   | ...            | 231 (49.3%)    | ...            | 11 340 (57.1%) |
| 350-500                                           | 3381 (22.7%)   | ...            | 955 (21.3%)    | ...            | 113 (24.1%)    | ...            | 4449 (22.4%)   |
| <350                                              | 2553 (17.1%)   | ...            | 1398 (31.1%)   | ...            | 125 (26.7%)    | ...            | 4076 (20.5%)   |
| Current HIV viral load (copies per ml) (n=19 374) |                |                |                |                |                |                |                |
| <50                                               | 9339 (64.6%)   | ...            | 1907 (43.0%)   | ...            | 304 (64.8%)    | ...            | 11 550 (59.6%) |
| 50-10 000                                         | 1824 (12.6%)   | ...            | 1479 (33.3%)   | ...            | 63 (13.4%)     | ...            | 3366 (17.4%)   |
| >10 000                                           | 3304 (22.8%)   | ...            | 1052 (23.7%)   | ...            | 102 (21.7%)    | ...            | 4458 (23.0%)   |

Abbreviations: MSM, men who have sex with men; MSMLWH, MSM living with HIV; WLWH, women living with HIV; MSW, men who have sex with women; MSWLWH, MSW living with HIV; HIV-neg, HIV negative; HSIL, high-grade squamous intraepithelial lesions; IQR, interquartile range.

The categories of (lifetime or recent) number of (anal) sexual partners were defined by the combination of median value for each population and the availability of categorical variables from contributed studies. \*MSM (low: ≤200; high: >200), women (low: ≤3; high: >3). †MSM (low: ≤5; high: >5), women (low: ≤1; high: >1). ‡MSM (low: ≤50; high: >50), women (low: 0; high: >0). §MSM (low: ≤3; high: >3), women (low: 0; high: >0).



**Supplementary Table S3. Hazard ratios of anal HPV16 incidence and clearance by population.**

|                                  | <b>aHR (95%CI) of MSW versus MSM</b> | <b>aHR (95%CI) of women versus MSM</b> |
|----------------------------------|--------------------------------------|----------------------------------------|
| Incidence                        | 0.22 (0.14–0.34)                     | 0.54 (0.47–0.62)                       |
| Clearance of prevalent infection | 3.51 (2.53–4.87)                     | 1.59 (1.34–1.89)                       |
| Clearance of incident infection  | 2.25 (1.31–3.84)                     | 1.93 (1.58–2.35)                       |

Hazard ratios (aHR) were adjusted by age group and HIV status. Abbreviations: HPV, human papillomavirus; MSM, men who have sex with men; MSW, men who have sex with women.

## Supplementary Figures

### Supplementary Figure S1. Flow chart.

Abbreviations: HPV, human papillomavirus; MSM, men who have sex with men; MSMLWH, MSM living with HIV; WLWH, women living with HIV; MSW, men who have sex with women; MSWLWH, MSW living with HIV.

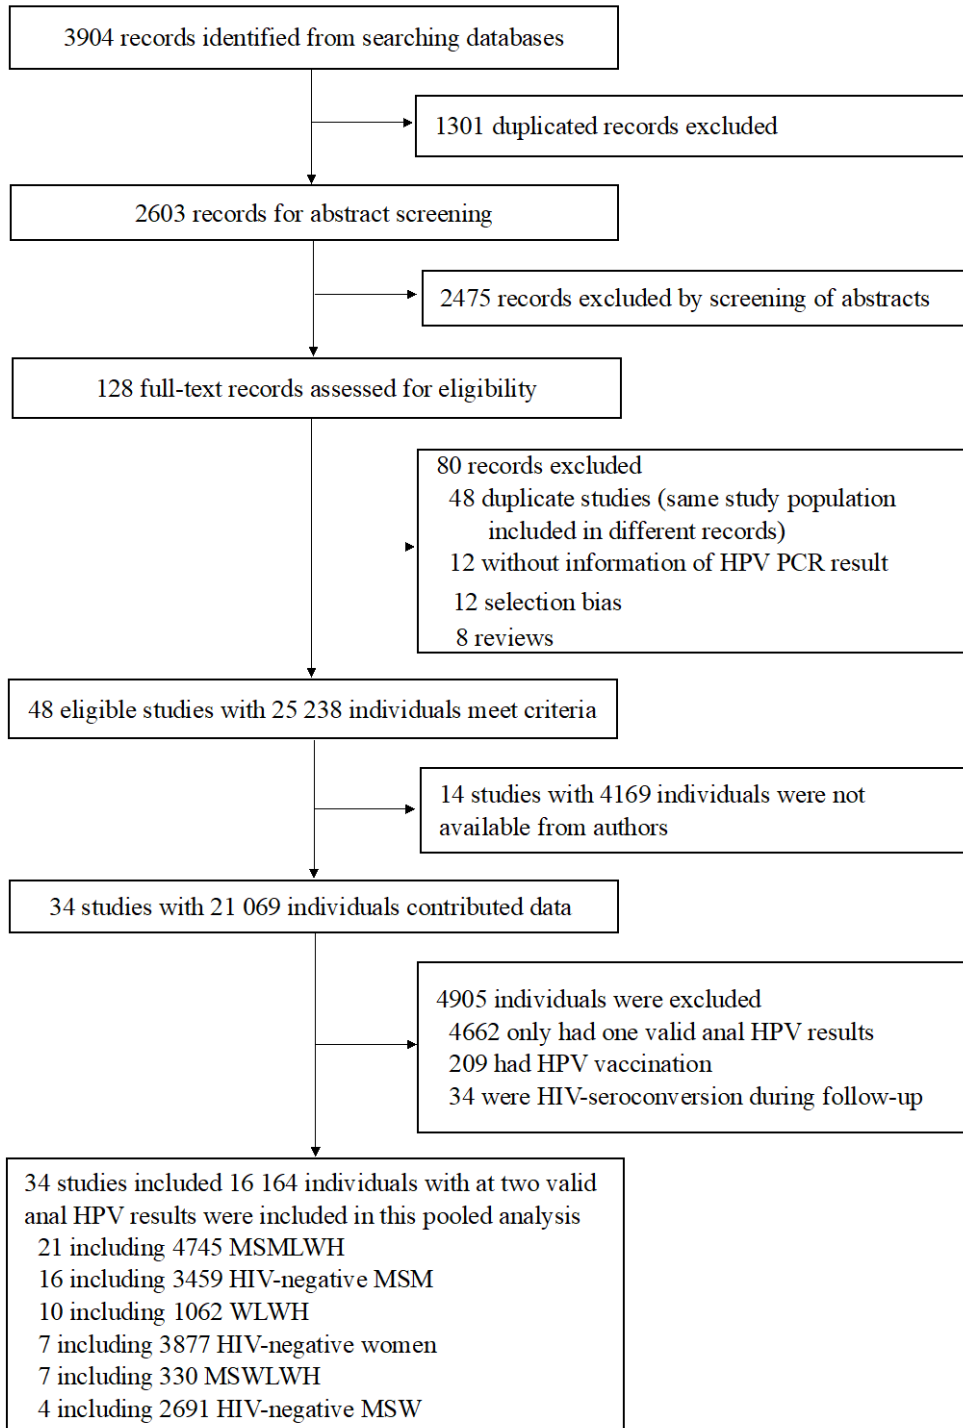

**Supplementary Figure S2. Number of anal high-risk HPV prevalent and incident infection during the study period in six risk groups.**

Abbreviations: HPV, human papillomavirus; HIV+, living with HIV; HIV-, HIV negative; MSM, men who have sex with men; MSW, men who have sex with women.

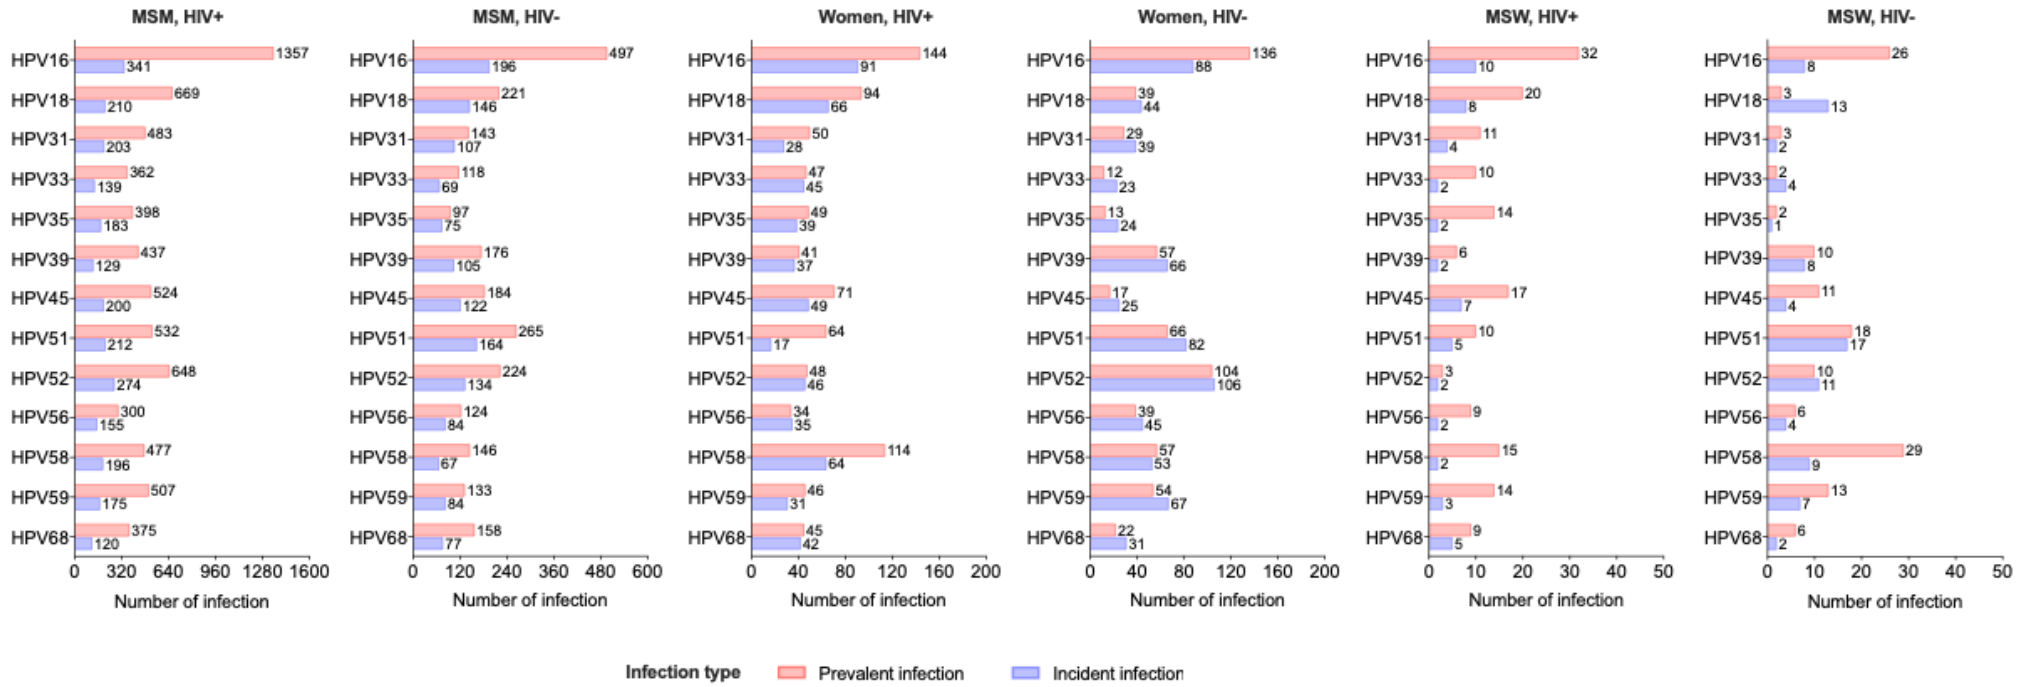

**Supplementary Figure S3. Cumulative incidence and clearance of anal HPV16 infection in WLWH and HIV-negative women, by age group.**

Error bar=95% CI. Abbreviations: HPV, human papillomavirus; HIV+, living with HIV; HIV-, HIV negative; WLWH, women living with HIV.

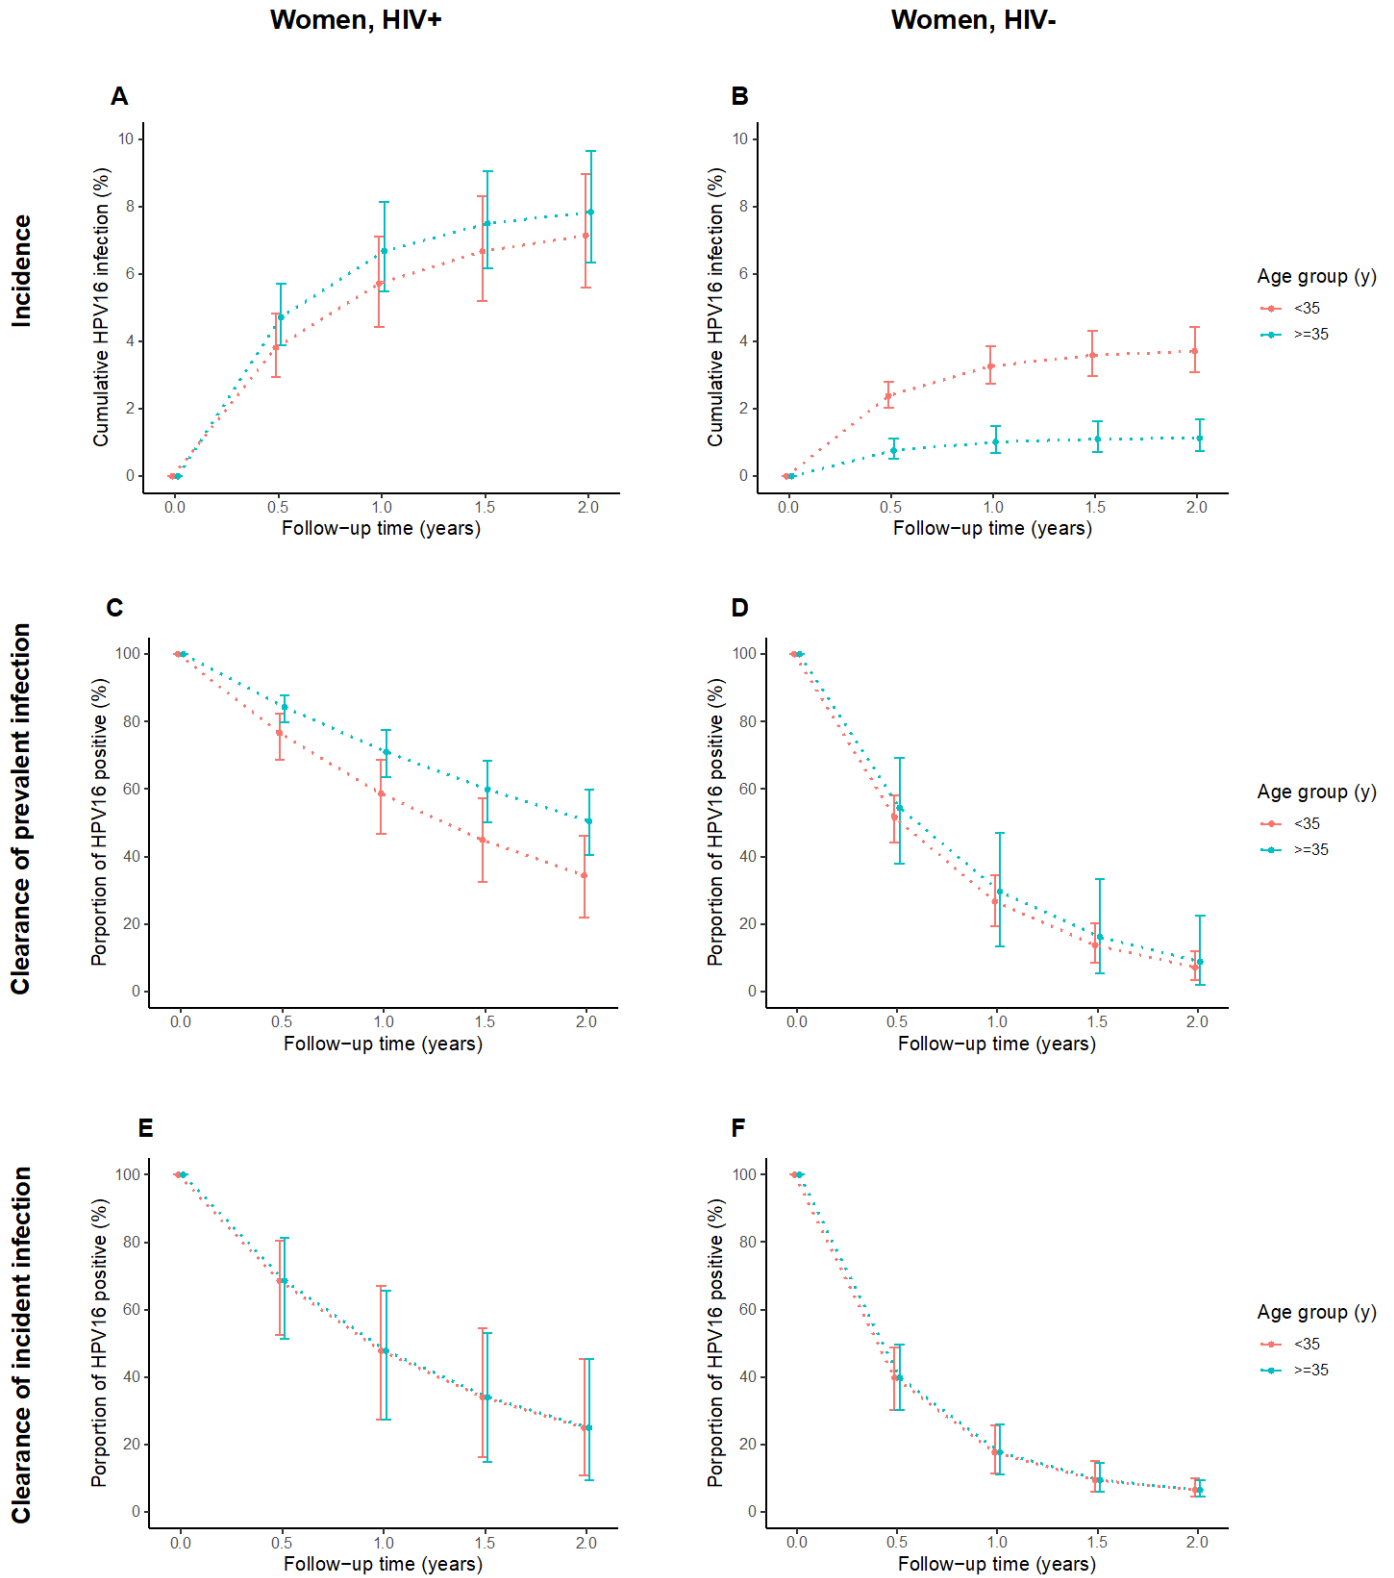

**Supplementary Figure S4. Prevalence at baseline of anal type-specific high-risk HPV infection in six risk groups.**

Error bar=95% CI. Abbreviations: HPV, human papillomavirus; HIV+, living with HIV; HIV-, HIV negative; MSM, men who have sex with men; MSW, men who have sex with women.

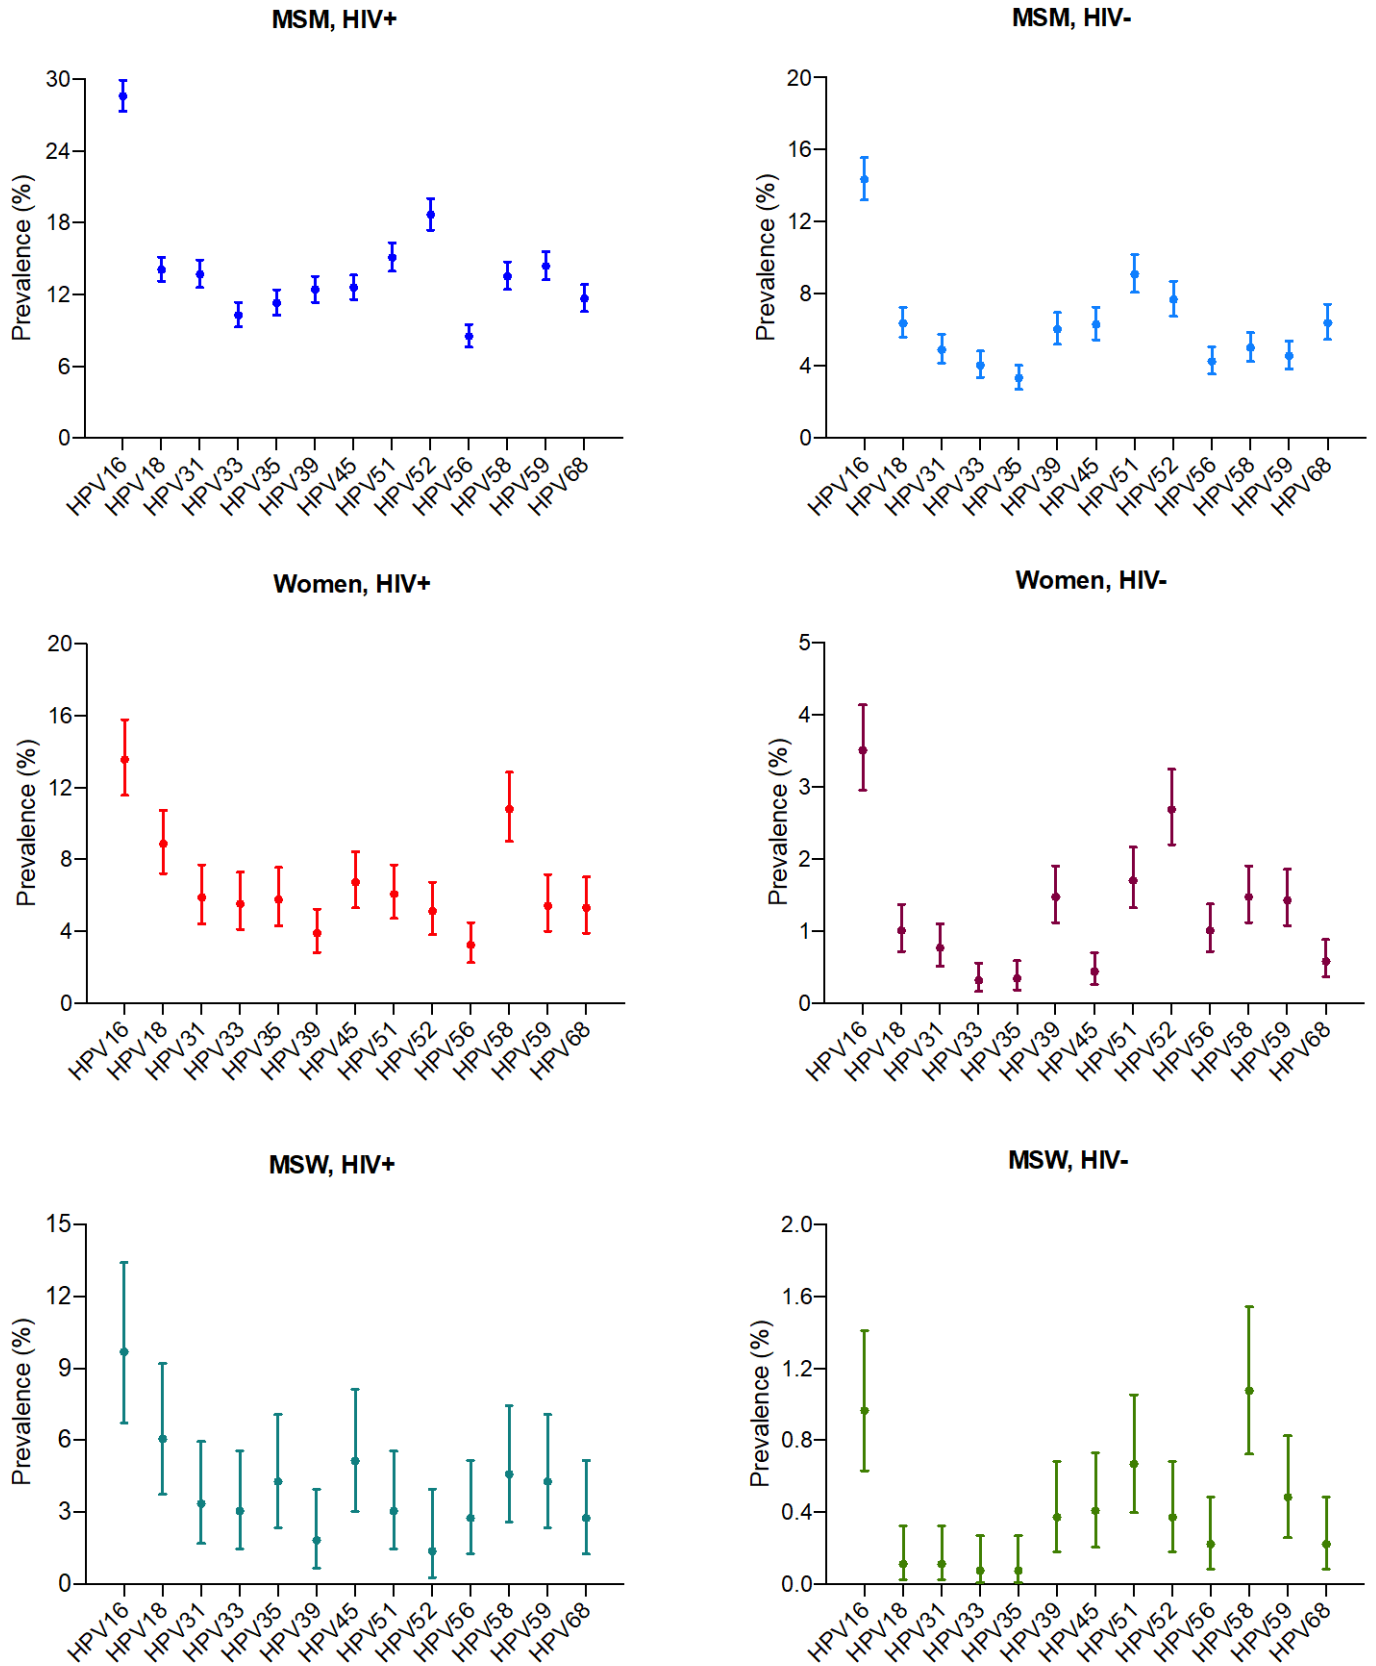

**Supplementary Figure S5. Incidence and clearance of anal type-specific high-risk HPV infection in six risk groups by use of standard person-time approach.**

Error bar=95% CI. Abbreviations: HPV, human papillomavirus; HIV+, HIV positive; HIV-, HIV negative; MSM, men who have sex with men; MSW, men who have sex with women. In standard person-time approach, incidence was defined as a positive HPV test result preceded by a negative HPV test. Time at risk for incidence started from the first HPV-negative visit of the HPV type under consideration, and it ended either at the midpoint between the last negative test and the first positive test, or at the date of the last HPV-negative sample (if the HPV outcome was not detected). Clearance was defined as the negative test result that was preceded by a positive test result. People entered the risk-set for clearance from the first HPV-positive visit, and they left the risk-set either at the midpoint between the last positive test and the first negative test or at the date of the last HPV-positive sample (if the HPV infection had not cleared).

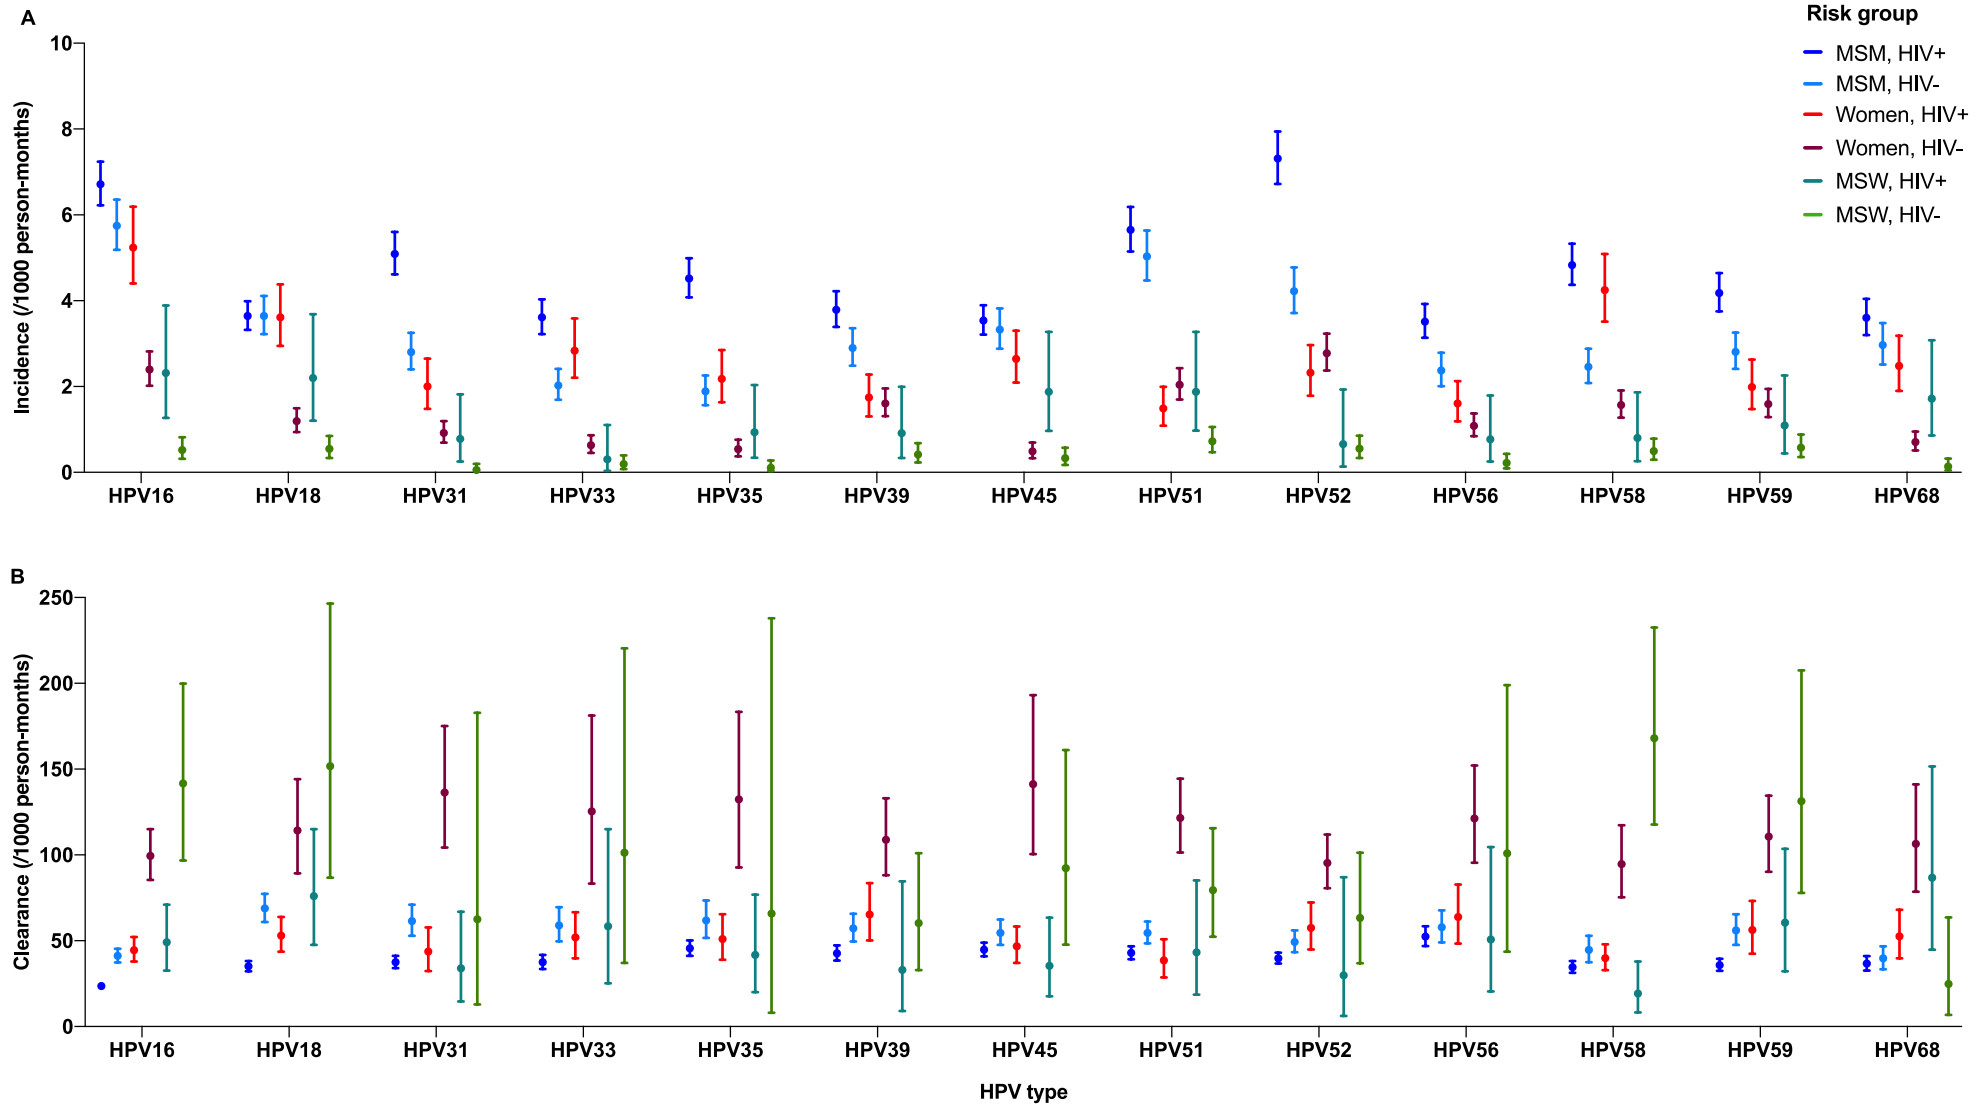

## References

1. Goodman MT, Shvetsov YB, McDuffie K, et al. Acquisition of anal human papillomavirus (HPV) infection in women: the Hawaii HPV Cohort study. *J Infect Dis* 2008; **197**(7): 957-66.
2. de Pokomandy A, Rouleau D, Ghattas G, et al. Prevalence, clearance, and incidence of anal human papillomavirus infection in HIV-infected men: the HIPVIRG cohort study. *J Infect Dis* 2009; **199**(7): 965-73.
3. Beachler DC, D'Souza G, Sugar EA, Xiao W, Gillison ML. Natural history of anal vs oral HPV infection in HIV-infected men and women. *J Infect Dis* 2013; **208**(2): 330-9.
4. Mullins TL, Wilson CM, Rudy BJ, Sucharew H, Kahn JA. Incident anal human papillomavirus and human papillomavirus-related sequelae in HIV-infected versus HIV-uninfected adolescents in the United States. *Sex Transm Dis* 2013; **40**(9): 715-20.
5. Phanuphak N, Teeratakulpisarn N, Pankam T, et al. Anal human papillomavirus infection among Thai men who have sex with men with and without HIV infection: prevalence, incidence, and persistence. *J Acquir Immune Defic Syndr* 2013; **63**(4): 472-9.
6. Wiley DJ, Li X, Hsu H, et al. Factors affecting the prevalence of strongly and weakly carcinogenic and lower-risk human papillomaviruses in anal specimens in a cohort of men who have sex with men (MSM). *PLoS one* 2013; **8**(11): e79492.
7. Hessol NA, Holly EA, Efrid JT, et al. Concomitant anal and cervical human papillomavirus V infections and intraepithelial neoplasia in HIV-infected and uninfected women. *AIDS* 2013; **27**(11): 1743-51.
8. Moscicki AB, Ma Y, Farhat S, et al. Natural history of anal human papillomavirus infection in heterosexual women and risks associated with persistence. *Clin Infect Dis* 2014; **58**(6): 804-11.
9. Burgos J, Curran A, Tallada N, et al. Risk of progression to high-grade anal intraepithelial neoplasia in HIV-infected MSM. *AIDS* 2015; **29**(6): 695-702.
10. Zou H, Tabrizi SN, Grulich AE, et al. Site-specific human papillomavirus infection in adolescent men who have sex with men (HYPER): an observational cohort study. *Lancet Infect Dis* 2015; **15**(1): 65-73.
11. Dona MG, Vescio MF, Latini A, et al. Anal human papillomavirus in HIV-uninfected men who have sex with men: incidence and clearance rates, duration of infection, and risk factors. *Clin Microbiol Infect* 2016; **22**(12): 1004 e1- e7.
12. Geskus RB, Gonzalez C, Torres M, et al. Incidence and clearance of anal high-risk human papillomavirus in HIV-positive men who have sex with men: estimates and risk factors. *AIDS* 2016; **30**(1): 37-44.
13. Schofield AM, Sadler L, Nelson L, et al. A prospective study of anal cancer screening in HIV-positive and negative MSM. *AIDS* 2016; **30**(9): 1375-83.
14. de Pokomandy A, Kaufman E, de Castro C, et al. The EVVA Cohort Study: Anal and Cervical Type-Specific Human Papillomavirus Prevalence, Persistence, and Cytologic Findings in Women Living With HIV. *J Infect Dis* 2017; **216**(4): 447-56.
15. Hidalgo-Tenorio C, de Jesus SE, Esquivias J, Pasquau J. High prevalence and incidence of HPV-related anal cancer precursor lesions in HIV-positive women in the late HAART era. *Enferm Infecc Microbiol Clin (Engl Ed)* 2018; **36**(9): 555-62.
16. Ong JJ, Aung E, Read TRH, et al. Clinical Characteristics of Anorectal Mycoplasma genitalium Infection and Microbial Cure in Men Who Have Sex With Men. *Sex Transm Dis* 2018; **45**(8): 522-6.
17. Chikandiwa A, Pisa PT, Tamalet C, et al. Prevalent, persistent anal HPV infection and squamous intraepithelial lesions: Findings from a cohort of men living with HIV in South Africa. *PLoS one* 2019; **14**(12): e0225571.
18. Hidalgo-Tenorio C, Gil-Anguita C, López Ruz MA, Omar M, López-Hidalgo J, Pasquau J. ART is key to clearing oncogenic HPV genotypes (HR-HPV) in anal mucosa of HIV-positive MSM. *PLoS one* 2019; **14**(10): e0224183.
19. Marra E, Kovaleva A, Bruisten SM, Vermeulen W, Boyd A, Schim van der Loeff MF. Incidence and Clearance of Anal High-risk Human Papillomavirus Infections and Their Determinants Over 5 Years Among Human Immunodeficiency Virus-negative Men Who Have Sex With Men. *Clin Infect Dis* 2019; **68**(9): 1556-65.
20. Nowak RG, Ndembu N, Dauda W, et al. Implementation of and Early Outcomes From Anal Cancer Screening at a Community-Engaged Health Care Facility Providing Care to Nigerian Men Who Have Sex With Men. *J Glob Oncol* 2019; **5**: 1-11.
21. Nyitray AG, Peng F, Day RS, et al. The association between body mass index and anal canal human papillomavirus prevalence and persistence: the HIM study. *Hum Vaccin Immunother* 2019; **15**(7-8): 1911-9.
22. Viciano P, Milanes-Guisado Y, Fontillon M, et al. High-risk Human Papilloma Virus Testing Improves Diagnostic Performance to Predict Moderate- to High-grade Anal Intraepithelial Neoplasia in Human Immunodeficiency Virus-infected Men Who Have Sex With Men in Low-to-Absent Cytological Abnormalities. *Clin Infect Dis* 2019; **69**(12): 2185-92.
23. Phanuphak N, Teeraananchai S, Hansudewechakul R, et al. Incidence and Persistence of High-risk Anogenital Human Papillomavirus Infection Among Female Youth With and Without Perinatally Acquired Human Immunodeficiency Virus Infection: A 3-year Observational Cohort Study. *Clin Infect Dis* 2020; **71**(8): e270-e80.
24. Alberts CJ, Heard I, Canestri A, et al. Incidence and Clearance of Anal Human Papillomavirus (HPV)-16 and HPV-18 Infection, and Their Determinants, Among Human Immunodeficiency Virus-Infected Men Who Have Sex With Men in France. *J Infect Dis* 2020; **221**(9): 1488-93.
25. Fan S, Li P, Ouyang L, et al. Anal Human Papillomavirus Infection among MSM Attending University in China: Implications for Vaccination. *Vaccines (Basel)* 2020; **8**(2): 175.
26. Gatechompol S, Teeratakulpisarn N, Wittawatmongkol O, et al. Incidence, Persistence, and Factors Associated With HPV Infection Among Male Adolescents With and Without Perinatally Acquired HIV Infection. *J Acquir Immune Defic Syndr* 2020; **85**(5): 553-60.
27. Wei F, Su Y, Cui X, et al. Sequential Acquisition of Human Papillomavirus Infection at Genital and Anal Sites, Liuzhou, China. *Emerg Infect Dis* 2020; **26**(10): 2387-93.
28. Yuniastuti E, Teeratakulpisarn N, Jeo WS, et al. Incidence, clearance, persistence and factors related with high-risk anal HPV persistence in South-East Asian MSM and transgender women. *AIDS* 2020; **34**(13): 1933-41.

29. Cotte L, Veyer D, Charreau I, et al. Prevalence and Incidence of Human Papillomavirus Infection in Men Having Sex With Men Enrolled in a Pre-exposure Prophylaxis Study: A Sub-study of the Agence Nationale de Recherches sur le SIDA et les Hepatites Virales "Intervention Preventive de l'Exposition aux Risques avec et pour les hommes Gays" Trial. *Clin Infect Dis* 2021; **72**(1): 41-9.
30. Liu LR, Xi MM, Chen Z, et al. A cohort study on the new infections and natural clearance of anal human papillomavirus types 16 and 18 in men who have sex with men. *Chin J Epidemiol* 2021; **42**(5): 872-7.
31. Poynten IM, Jin F, Garland SM, et al. HIV, Immune Dysfunction, and the Natural History of Anal High-Risk Human Papillomavirus Infection in Gay and Bisexual Men. *J Infect Dis* 2021; **224**(2): 246-57.
32. Squillace N, Bernasconi DP, Lapadula G, et al. HPV 16 and 18 contribute to development of anal dysplasia in HIV infection irrespective of gender and sexual orientation. *HIV Med* 2021; **22**(9): 860-6.
33. Donà MG, Giuliani M, Rollo F, et al. Incidence and clearance of anal high-risk Human Papillomavirus infection and their risk factors in men who have sex with men living with HIV. *Sci Rep* 2022; **12**(1): 184.
34. Zhou Y, Zhou X, Lin YF, et al. Incidence, Persistence, and Clearance of Anal Human Papillomavirus among Men Who Have Sex with Men in China: An Observational Cohort Study. *Pathogens* 2022; **11**(3): 314.
